# Supplementary material
Source: Springer Nature journal article supplement (https://www.springermedizin.de/resource/supplementary/12916_2006_96_MOESM10_ESM.pdf/9599160)

# Control graph

Illustration H: Lifetime risk for lung cancer to age 74 years

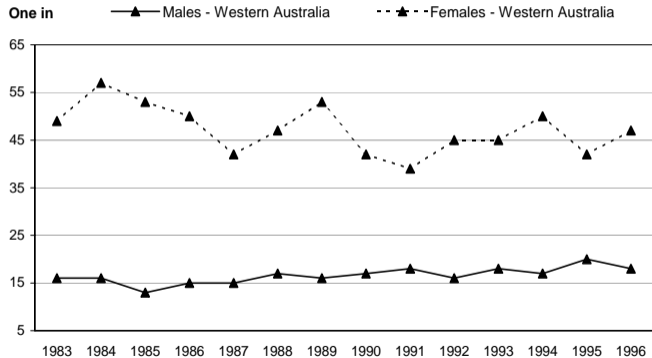

# Intervention graph

Illustration H: Lifetime risk for lung cancer to age 74 years

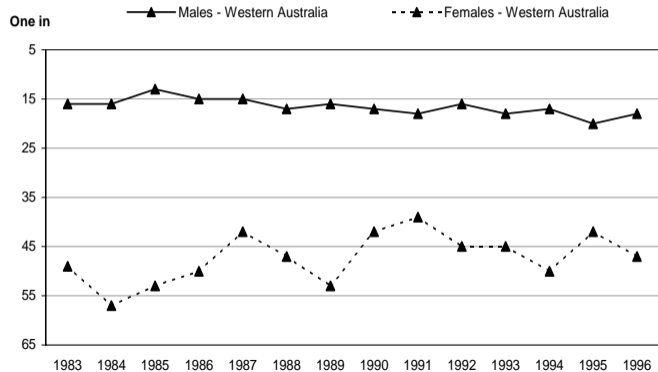

Supplement: MOESM10 [file 9599160]
